# Supplementary material for: Cancer associated fibroblasts sculpt tumour microenvironment by recruiting monocytes and inducing immunosuppressive PD-1+ TAMs
Source: PubMed Central journal article supplement (PMC6395633; doi:10.1038/s41598-019-39553-z), 2019-02-28
Supplement: 41598_2019_39553_MOESM1_ESM.pdf [file 41598_2019_39553_MOESM1_ESM.pdf]

## Supplementary Information

for

Cancer associated fibroblasts sculpt tumour microenvironment by recruiting monocytes and inducing immunosuppressive PD-1<sup>+</sup> TAMs

Betul Gok Yavuz<sup>1</sup>, Gurcan Gunaydin<sup>1</sup>, M. Emre Gedik<sup>1</sup>, Kemal Kosemehmetoglu<sup>2</sup>, Derya Karakoc<sup>3</sup>, Figen Ozgur<sup>4</sup> and Dicle Guç<sup>1</sup>

<sup>1</sup>*Department of Basic Oncology, Hacettepe University Cancer Institute, Sıhhiye, 06100, Ankara, Turkey*

<sup>2</sup>*Department of Pathology, Hacettepe University School of Medicine, Sıhhiye, 06100, Ankara, Turkey*

<sup>3</sup>*Department of General Surgery, Hacettepe University School of Medicine, Sıhhiye, 06100, Ankara, Turkey*

<sup>4</sup>*Department of Plastic Reconstructive and Aesthetic Surgery, Hacettepe University School of Medicine, Sıhhiye, 06100, Ankara, Turkey*

FAP

CAF

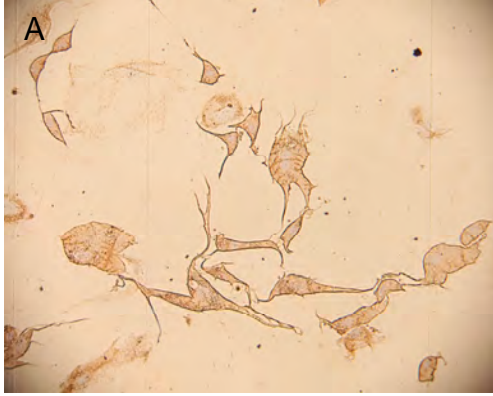

NF

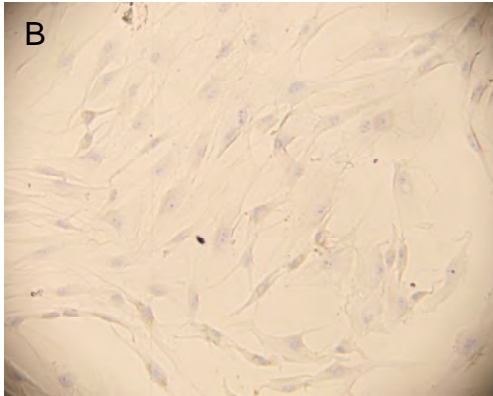

**Sup. Figure 1**

**Sup. Figure 1. Immunocytochemical characteristics of NF and CAF cells.** CAFs and NFs were cultured in 8-well chamber slides. CAFs (A) and NFs (B) were stained with anti-fibroblast activation protein (FAP) antibody. One representative figure for each cell type is shown ( $\times 100$ ).

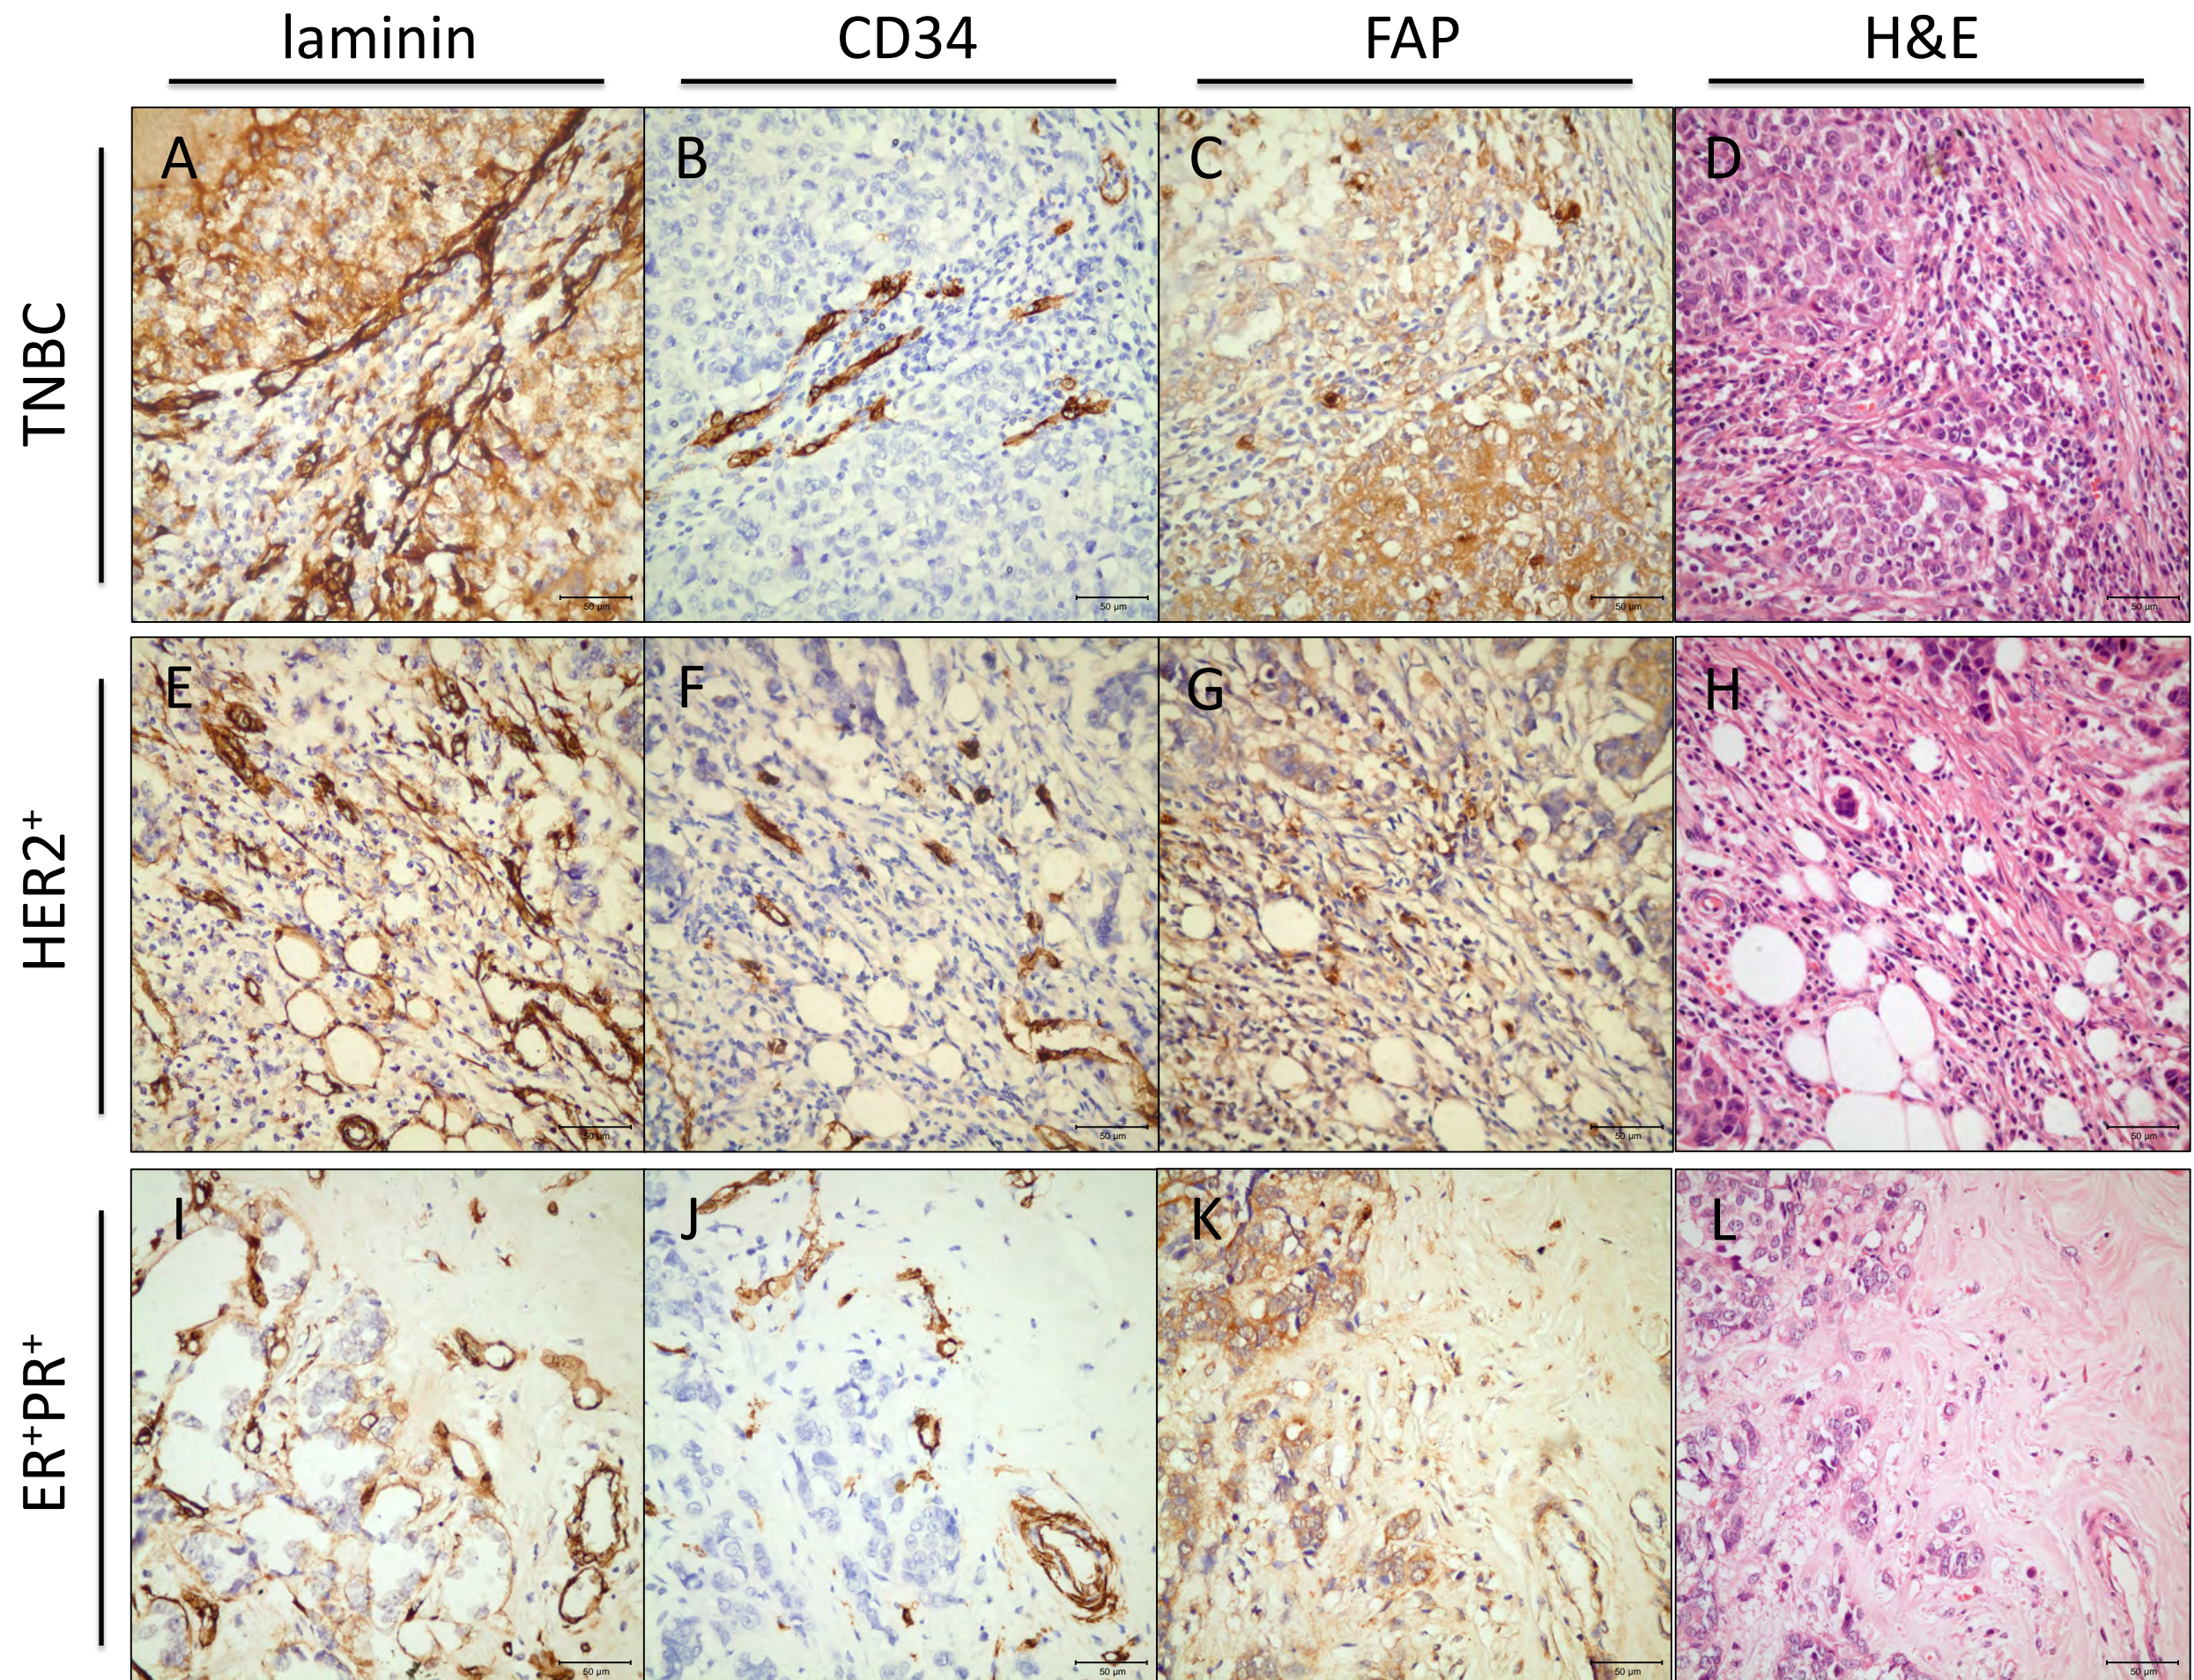

**Sup. Figure 2. Immunohistochemical characteristics of breast cancer tissue samples.**

Immunohistochemical stainings for laminin (Novocastra, 1:50), CD34 (Leica Biosystems, 1:400), FAP (St John's Laboratory, 1:200), and Haematoxylin & Eosin (H&E) in breast cancer samples are shown. Laminin (A), CD34 (B), FAP (C), and H&E (D) were stained in a triple-negative breast cancer (TNBC) tissue sample. Laminin (E), CD34 (F), FAP (G), and H&E (H) were stained in a HER2<sup>+</sup> breast cancer tissue sample. Laminin (I), CD34 (J), FAP (K), and H&E (L) were stained in an ER<sup>+</sup>PR<sup>+</sup> breast cancer tissue sample (×400; scale bar, 50 μm). Three representative cases are shown.

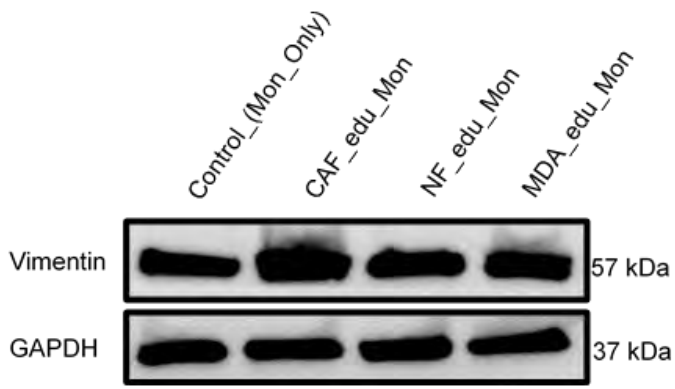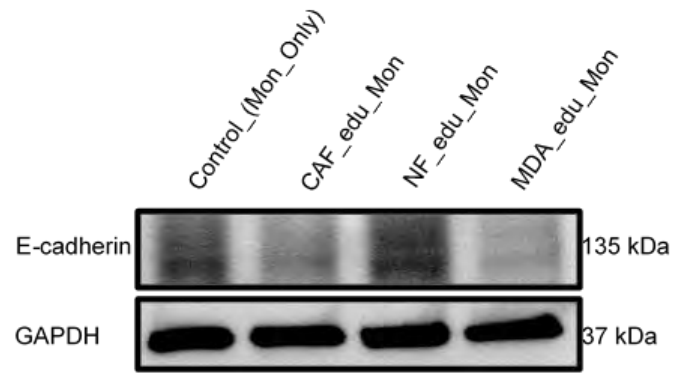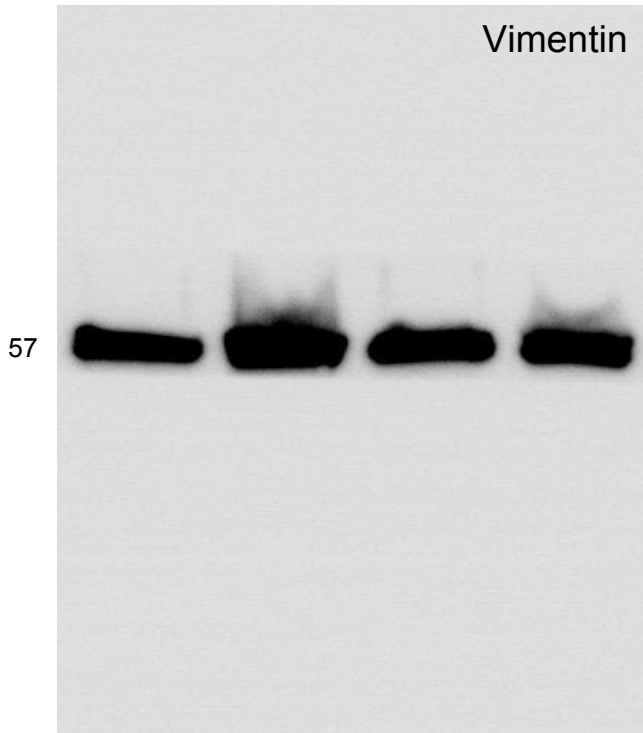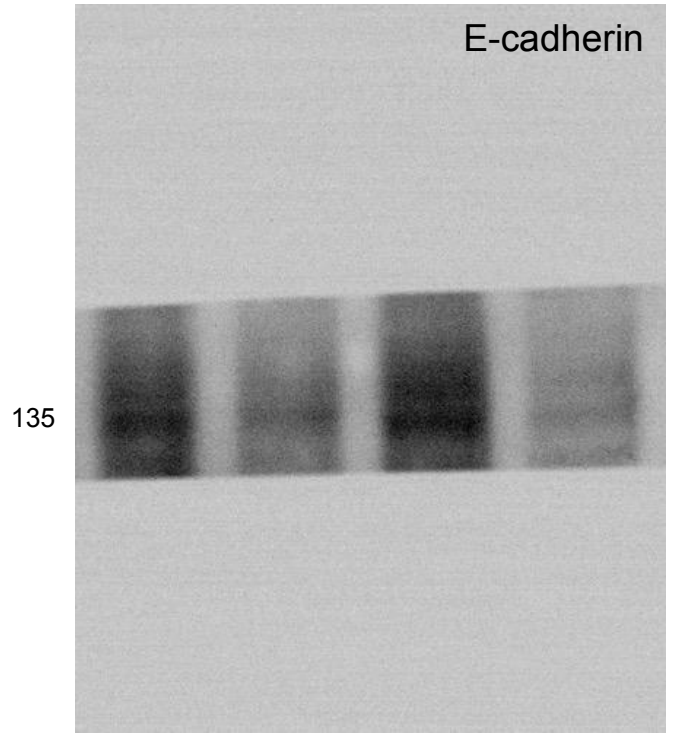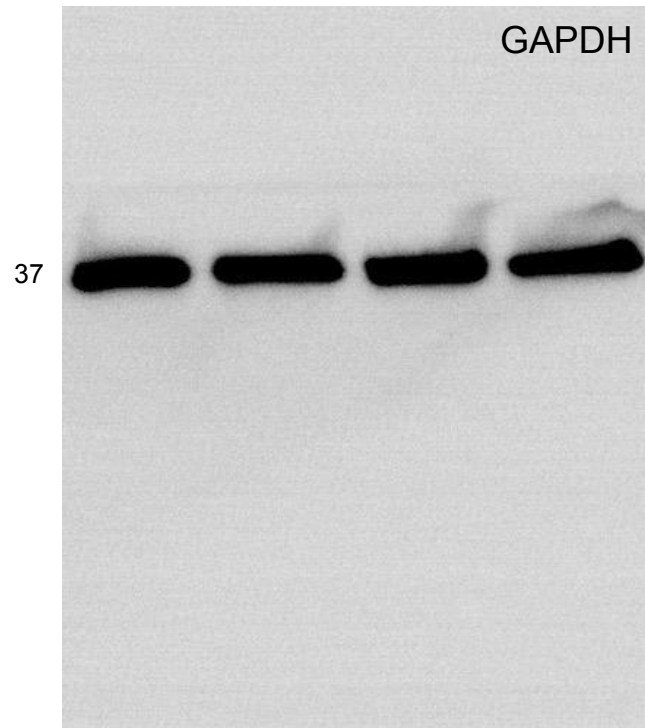

**Sup. Figure 3**

**Sup. Figure 3. Original immunoblots for Figure 6.** Monocytes were cultured for 7 days with CMs from NF, CAF or MDA-MB-231 cells as well as in standard medium. All of the differentiated monocytes were then serum starved for 48 hours before obtaining the corresponding CMs. MDA-MB-231 cells were incubated with those CMs from differentiated monocytes for 24 hours. The effects of NF-, CAF- or MDA-MB-231-educated monocyte CMs on the EMT of MDA-MB-231 breast cancer cells were analysed by Western blot analysis of vimentin and E-cadherin proteins. Levels of GAPDH were used as a loading control.
